# Supplementary material for: The morphology evolution, tunable down-conversion luminescence, and energy transfer of [CaY]F2 crystals doped with Li+/Ce3+/Tb3+
Source: Royal Society of Chemistry journal article supplement (doi:10.1039/d0dt02955f), 2020-01-01
Supplement: d0dt02955f1.pdf [file d0dt02955f1.pdf]

## Supporting Information

### **Morphology evolution, tunable down conversion luminescence and energy transfer of [CaY]F<sub>2</sub> crystals doped with Li<sup>+</sup>/Ce<sup>3+</sup>/Tb<sup>3+</sup>**

Yini Mao,<sup>a</sup> Zhiyi Wang,<sup>a</sup> Rui Ye,<sup>a</sup> Li Jiang,<sup>a</sup> Shanshan Hu<sup>\*a</sup> and Jun Yang<sup>\*a</sup>

<sup>a</sup>School of Chemistry and Chemical Engineering, Southwest University, No. 2 Tiansheng Road, Beibei District, Chongqing 400715, China.

E-mail: [hushan3@swu.edu.cn](mailto:hushan3@swu.edu.cn) and [jyang@swu.edu.cn](mailto:jyang@swu.edu.cn)

**Table S1.** The emission and the absorption integral area values of the [CaY]F<sub>2</sub>:0.1%Tb<sup>3+</sup> phosphors with different morphology.

| Contents of EDTA (g) | Morphology           | Integral <sub>(emission)</sub> | Integral <sub>(absorption)</sub> |
|----------------------|----------------------|--------------------------------|----------------------------------|
| 0                    | octahedral           | 9885.3694                      | 1154.8755                        |
| 0.35                 | cube                 | 12861.02547                    | 1129.0104                        |
| 0.40                 | truncated cube       | 12247.3692                     | 1138.6272                        |
| 0.45                 | truncated octahedron | 11232.0321                     | 1152.9481                        |
| 0.50                 | spherical            | 10695.98401                    | 1139.526                         |

**Table S2.** The relative quantum yields of [CaY]F<sub>2</sub>:0.1%Tb<sup>3+</sup> samples with different morphology at an excitation wavelength of 215 nm.

| Contents of EDTA (g) | Morphology           | $\lambda_{\text{ex}} = 215 \text{ nm}$ |
|----------------------|----------------------|----------------------------------------|
| 0                    | octahedral           | 46.07                                  |
| 0.35                 | cube                 | 53.49                                  |
| 0.40                 | truncated cube       | 53.06                                  |
| 0.45                 | truncated octahedron | 51.88                                  |
| 0.50                 | spherical            | 46.52                                  |

The relative quantum yield (RQY) can be calculated according to the following equation:<sup>1-3</sup>

$$RQY = \frac{L_{\text{Sample}}}{E_{\text{Reference}} - E_{\text{Sample}}}$$

Where  $L_{\text{Sample}}$  is the emission integrals of samples,  $E_{\text{Reference}}$  and  $E_{\text{Sample}}$  represent the absorption integrals of reference and samples. Use Hitachi F-7000 to measure the emission spectrum of the sample, use UV-2700 to measure the absorption spectrum of the sample and reference, respectively. Then integrate with the origin software to obtain the corresponding integral value as shown in Table S1.

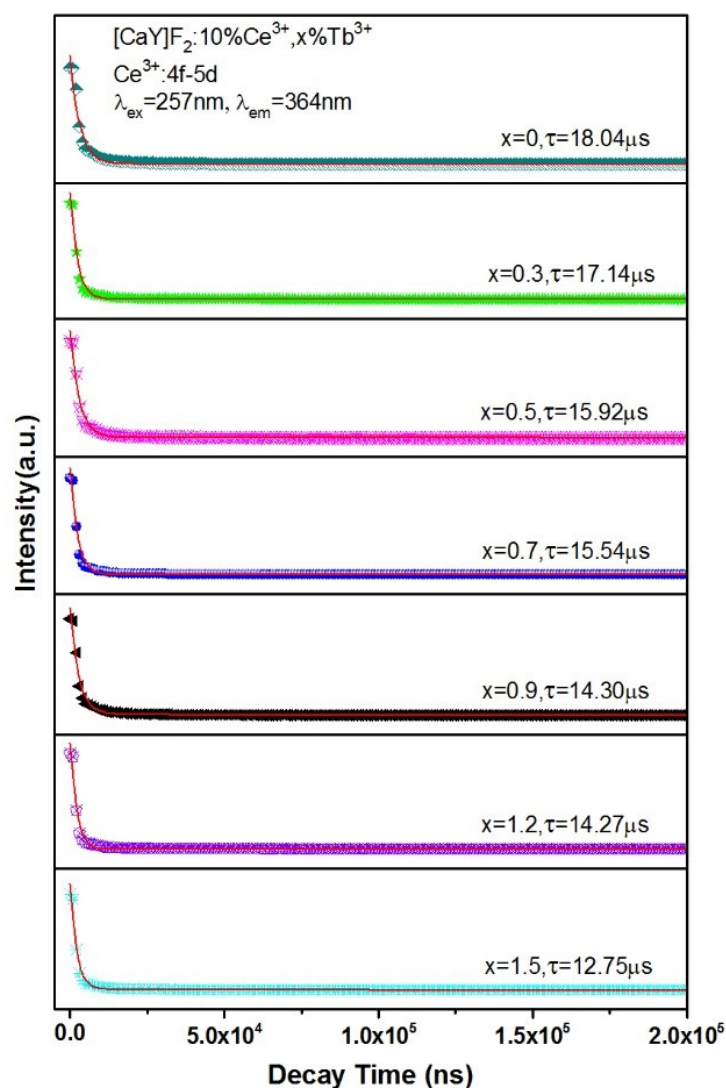

**Figure S1.** Luminescence decay curves of  $\text{Ce}^{3+}$  emission (4f-5d) in  $[\text{CaY}]\text{F}_2:10\%\text{Ce}^{3+}$ ,  $x\%\text{Tb}^{3+}$  ( $x = 0, 0.3, 0.5, 0.7, 0.9, 1.2, 1.5$ ).

The luminescence decay curves of  $\text{Ce}^{3+}$  emission in  $[\text{CaY}]\text{F}_2:10\%\text{Ce}^{3+}$ ,  $x\%\text{Tb}^{3+}$  ( $x = 0, 0.3, 0.5, 0.7, 0.9, 1.2, 1.5$ ) were measured to further understand the excited state dynamics of the energy transfer process. Fig. S1 presents the  $\text{Ce}^{3+}$  decay curves in  $[\text{CaY}]\text{F}_2:10\%\text{Ce}^{3+}$ ,  $x\%\text{Tb}^{3+}$ , which are all well fitted into a second order exponential function as:<sup>1</sup>

$$I(t) = I_0 + A_1 \exp(-t / \tau_1) + A_2 \exp(-t / \tau_2)$$

Where  $I(t)$  represents the emission intensity,  $\tau_1$  and  $\tau_2$  respectively refer to the rapid and slow decay time of the exponential function,  $A_1$  and  $A_2$  are constants. The

average decay time can be calculated by the following formula:<sup>3, 4</sup>

$$\tau = (A_1\tau_1^2 + A_2\tau_2^2) / (A_1\tau_1 + A_2\tau_2)$$

As shown in Fig. S1, the average decay times of [CaY]F<sub>2</sub>:10%Ce<sup>3+</sup>, x%Tb<sup>3+</sup> (x = 0, 0.3, 0.5, 0.7, 0.9, 1.2, 1.5) were calculated to be 18.04, 17.14, 15.92, 15.54, 14.30, 13.27 and 12.75  $\mu$ s, respectively. Obviously, the decay time of Ce<sup>3+</sup> decreases monotonically with the increase of the Tb<sup>3+</sup> concentration, which strongly proves the fact that the energy has been successfully transferred from Ce<sup>3+</sup> to Tb<sup>3+</sup> and reasonably explains the phenomenon that the emission peak of Tb<sup>3+</sup> obtained under excitation at 257 nm is much stronger than that of 215 nm.

- [1] Z. Jia, X. L. Zhang, X. Y. Hua, Y. Dong, H. L. Li, C. Q. Feng, Y. G. Wang, M. J. Xia, *Journal of Alloys and Compounds*, 2020, 844, 155875.
- [2] H. Guo, X. Y. Huang, *Journal of Alloys and Compounds*, 2018, 764, 809-814.
- [3] L. M. Teng, W. N. Zhang, W. P. Chen, J. K. Cao, X. Y. Sun, H. Guo, *Ceramics International*, 2020, 46, 10718–10722.
- [4] W. P. Xia, Y. F. Zhang, J. Xiong, S. S. Hu, J. Yu, Y. F. Zhang, Y. X. Wang and J. Yang, *CrystEngComm*, 2019, 21, 339-347.
- [5] C. Li, H. W. Zheng, H. W. Wei, S. J. Qiu, L. Xu, X. M. Wang and H. Jiao, *Dalton Trans.*, 2018, 47, 6860-6867.
